# Supplementary material for: IL17 factors are early regulators in the gut epithelium during inflammatory response to Vibrio in the sea urchin larva
Source: eLife journal article supplement (doi:10.7554/elife.23481), 2017-04-27
Supplement: supp [file elife-23481-supp-v1.zip]

|      |      |   |                                                                                                          |     |     |     |     |         |     |     |     |     |         |     |
|------|------|---|----------------------------------------------------------------------------------------------------------|-----|-----|-----|-----|---------|-----|-----|-----|-----|---------|-----|
|      |      |   | 10                                                                                                       | 20  | 30  | 40  | 50  | Exon 14 | 60  | 70  | 80  | 90  | 100     |     |
|      |      |   | ..... ..... ..... ..... ..... ..... ..... ..... ..... ..... ..... ..... ..... ..... ..... .....          |     |     |     |     |         |     |     |     |     |         |     |
| MASO | Con. | 1 | CCATGACTGCAACTGTGGAAATGAAGCTATCAACTCCACGAATGTCAGAAATATCTGTCCAGATGGTAGAACGTGTAATGCTAGCAGGTGTGATGAGCAT     |     |     |     |     |         |     |     |     |     |         |     |
| MASO | Con. | 2 | CCATGACTGCAACTGTGGAAATGAAGCTATCAACTCCACGAATGTCAGAAATATCTGTCCAGATGGTAGAACGTGTAATGCTAGCAGGTGTGATGAGCAT     |     |     |     |     |         |     |     |     |     |         |     |
| MASO | Con. | 3 | CCATGACTGCAACTGTGGAAAWGAAGCTATCAACTCCACGAATGTCAGAAATATCTGTCCAGATGGTAGAACGTGTAATGCTAGCAGGTGTGATGAGCAT     |     |     |     |     |         |     |     |     |     |         |     |
| MASO | Con. | 4 | CCAYGACTGCAACTGTGGAAAWGAAGCTATCAACTCCACGAATGTCAGAAATATCTGTCCAGATGGTAGAACGTGTAATGCTAGCAGGTGTGATGAGCAT     |     |     |     |     |         |     |     |     |     |         |     |
| MASO | Sp1. | 1 | CCATGACTGCAACTGTGGAAAWGAAGCTATCAACTCCACGAATGTCAGAAATATCTGTCCAGATGGTAGAACGTGTAATGCTAGCAG-----             |     |     |     |     |         |     |     |     |     |         |     |
| MASO | Sp1. | 2 | CCATGACTGCAACTGTGGAAAWGAAGCTATCAACTCCACGAAGTTCAGAAATATCTGTCCAGATGGTAGAACGTGTAATGCTAGCAG-----             |     |     |     |     |         |     |     |     |     |         |     |
| MASO | Sp1. | 3 | CCATGRCCTGCWRCTGTGGARATGAAGCTATCMMCTCCACGAATGTCARAAATATCTGTCCAGATGGTAGAACGTGTAATGCTAGCAG-----            |     |     |     |     |         |     |     |     |     |         |     |
|      |      |   | 110                                                                                                      | 120 | 130 | 140 | 150 | 160     | 170 | 180 | 190 | 200 |         |     |
|      |      |   | ..... ..... ..... ..... ..... ..... ..... ..... ..... ..... ..... ..... ..... ..... ..... .....          |     |     |     |     |         |     |     |     |     |         |     |
| MASO | Con. | 1 | GTCCACYGCAACTACATCCATATGCCAGGGGGAGTTTCGATAACAACCTGCTCCTGTGTTTCCTGGCTACTCCTTCAACGAGGAAGGGCAAYGTGAAAAGGATA |     |     |     |     |         |     |     |     |     |         |     |
| MASO | Con. | 2 | GTCCACYGCAACTACATCCATATGCCAGGGGGAGTTTCGATAACAACCTGCTCCTGTGTTTCCTGGCTACTCCTTCAACGAGGAAGGGCAATGTGAAAAGGATA |     |     |     |     |         |     |     |     |     |         |     |
| MASO | Con. | 3 | GTCCACYGCAACTACATCCATATGCCAGGGGGAGTTTCGATAACAACCTGCTCCTGTGTTTCCTGGCTACTCCTTCAACGAGGAAGGGCAATGTGAAAAGGATA |     |     |     |     |         |     |     |     |     |         |     |
| MASO | Con. | 4 | GTCCACYGCAACTACATCCATATGCCAGGGGGAGTTTCGATAACAACCTGCTCCTGTGTTTCCTGGCTACTCCTTCAACGAGGAAGGGCAAYGTGAAAAGGATA |     |     |     |     |         |     |     |     |     |         |     |
| MASO | Sp1. | 1 | -----                                                                                                    |     |     |     |     |         |     |     |     |     |         |     |
| MASO | Sp1. | 2 | -----                                                                                                    |     |     |     |     |         |     |     |     |     |         |     |
| MASO | Sp1. | 3 | -----                                                                                                    |     |     |     |     |         |     |     |     |     |         |     |
|      |      |   | 210                                                                                                      | 220 | 230 | 240 | 250 | Exon 15 | 260 | 270 | 280 | 290 | 300     |     |
|      |      |   | ..... ..... ..... ..... ..... ..... ..... ..... ..... ..... ..... ..... ..... ..... ..... .....          |     |     |     |     |         |     |     |     |     |         |     |
| MASO | Con. | 1 | AGACAGYGTATYTGGTGGTGATAGTTGTTGTAGCGGTATTTTGTGTTTACAGCATYGCCTAGTGGGCTTCAGATTTCCTAAAGACCAGSCCAGMCAA        |     |     |     |     |         |     |     |     |     |         |     |
| MASO | Con. | 2 | AGACAGYGTATYTGGTGGTGATAGTTGTTGTAGCGGTATTTTGTGTTTACAGCATYGCCTAGTGGGCTTCAGATTTCCTAAAGACCAGSCCAGMCAA        |     |     |     |     |         |     |     |     |     |         |     |
| MASO | Con. | 3 | AGACAGYGTATYTGGTGGTGATAGTTGTTGTAGCGGTATTTCTTTTGTGTTTACAGCATYGCCTAGTGGGCTTCAGATTTCCTAAAGACCAGSCCAGACAA    |     |     |     |     |         |     |     |     |     |         |     |
| MASO | Con. | 4 | AGACGGTGTATYTGGTGGTGATAGTTGTTGTAGCGGTATTTTGTGTTTACAGCATYGCCTAGTGGGCTTCAGATTTCCTAAAGACCAGSCCAGMCAA        |     |     |     |     |         |     |     |     |     |         |     |
| MASO | Sp1. | 1 | -----                                                                                                    |     |     |     |     |         |     |     |     |     |         |     |
| MASO | Sp1. | 2 | -----                                                                                                    |     |     |     |     |         |     |     |     |     |         |     |
| MASO | Sp1. | 3 | -----                                                                                                    |     |     |     |     |         |     |     |     |     |         |     |
|      |      |   | 310                                                                                                      | 320 | 330 | 340 | 350 | Exon 16 | 360 | 370 | 380 | 390 | Exon 17 | 400 |
|      |      |   | ..... ..... ..... ..... ..... ..... ..... ..... ..... ..... ..... ..... ..... ..... ..... .....          |     |     |     |     |         |     |     |     |     |         |     |
| MASO | Con. | 1 | GATATGCCAGCGGAACCCGTACAGYGAGGATATAAGCCCATCACCACCTACACCTCCTCCAGAACCAAAWAACCTACCCGCATAATGAGCCCTCAGACGTT    |     |     |     |     |         |     |     |     |     |         |     |
| MASO | Con. | 2 | GATATGCCAGCGGAACCCGTACAGYGAGGATATAAGCCCATCACCACCTACACCTCCTCCAGAACCAAAATACTACCCGCATAATGAGCCCTCAGACGTT     |     |     |     |     |         |     |     |     |     |         |     |
| MASO | Con. | 3 | GATATGCCAGCGGAACCCGTACAGYG-----AGCCCTCAGACGTT                                                            |     |     |     |     |         |     |     |     |     |         |     |
| MASO | Con. | 4 | GATATGCCAGYGGAACCCGTACAGYG-----AGCCCTCAGACGTT                                                            |     |     |     |     |         |     |     |     |     |         |     |
| MASO | Sp1. | 1 | -----AGGATATAAGCCCATCACCACCTACACCTCCTCCAGAACCAAAATACTACCCGCATAATGAGCCCTCAGACGTT                          |     |     |     |     |         |     |     |     |     |         |     |
| MASO | Sp1. | 2 | -----AGGATATAAGCCCATCACCACCTACACCTCCTCCAGAACCAAAATACTACCCGCATAATGAGCCCTCAGACGTT                          |     |     |     |     |         |     |     |     |     |         |     |
| MASO | Sp1. | 3 | -----AGGATATAASCCCATCACCACCTACACCTCCTCCAGAACCAAAATACTACCCGCATAATGAGCCCTCAGACGTT                          |     |     |     |     |         |     |     |     |     |         |     |
|      |      |   | 410                                                                                                      | 420 | 430 | 440 | 450 | 460     | 470 | 480 | 490 | 500 |         |     |
|      |      |   | ..... ..... ..... ..... ..... ..... ..... ..... ..... ..... ..... ..... ..... ..... ..... .....          |     |     |     |     |         |     |     |     |     |         |     |
| MASO | Con. | 1 | CGGAGGGTSTWCGAACCAATCCCAAGTATYTTAAACAGSCCGGKGAAGGGGGKGGTGCTATAGATTACACCATCGAATCCAACAACGSTACCAACAACG      |     |     |     |     |         |     |     |     |     |         |     |
| MASO | Con. | 2 | CGGAGGGTSTWCGAACCAATCCCAAGTATYTTAAACAGSCCGGTGAAGGGGGKGGTGCTATAGATTACACCATCGAATCCAACAACGSTACCAACAACG      |     |     |     |     |         |     |     |     |     |         |     |
| MASO | Con. | 3 | CGGAGGGTSTWCGAACCAATCCCAAGTATYTTAAACAGSCCGGTGAATGGGGTGGTGCTATAGATTACACCATCGAATCCAACAACGSTACCAACAACG      |     |     |     |     |         |     |     |     |     |         |     |
| MASO | Con. | 4 | CGGAGGGTSTWCGAACCAATCCCAAGTATCCTAAACAGSCCGGTGAAGGGGGKGGTGCTATAGATTACACCATCGAATCCAACAACGSTACCAACAACG      |     |     |     |     |         |     |     |     |     |         |     |
| MASO | Sp1. | 1 | CGGAGGGTSTWCGAACCAATCCCAAGTATCCTAAACAGGCCGGTGAATGGGGKGGTGCTATAGATTACACCATCGAATCCAACAACGCTACCAACAACG      |     |     |     |     |         |     |     |     |     |         |     |
| MASO | Sp1. | 2 | CGGAGGGTSTWCGAACCAATCCCAAGTATCCTAAACAGGCCGGTGAATGGGGTGGTGCTATAGATTACACCATCGAATCCAACAACGSTACCAACAACG      |     |     |     |     |         |     |     |     |     |         |     |
| MASO | Sp1. | 3 | CGGAGGGTCTACSAACCAATCCCAAGTATCCTAAACAGGCCGGTGAATGGGGTGGTGCTATAGATTACACCATCGAATCCAACAACGCTACCAACAACG      |     |     |     |     |         |     |     |     |     |         |     |
