# Supplementary material for: IL17 factors are early regulators in the gut epithelium during inflammatory response to Vibrio in the sea urchin larva
Source: eLife journal article supplement (doi:10.7554/elife.23481), 2017-04-27
Supplement: supp [file elife-23481-supp-v1.zip]

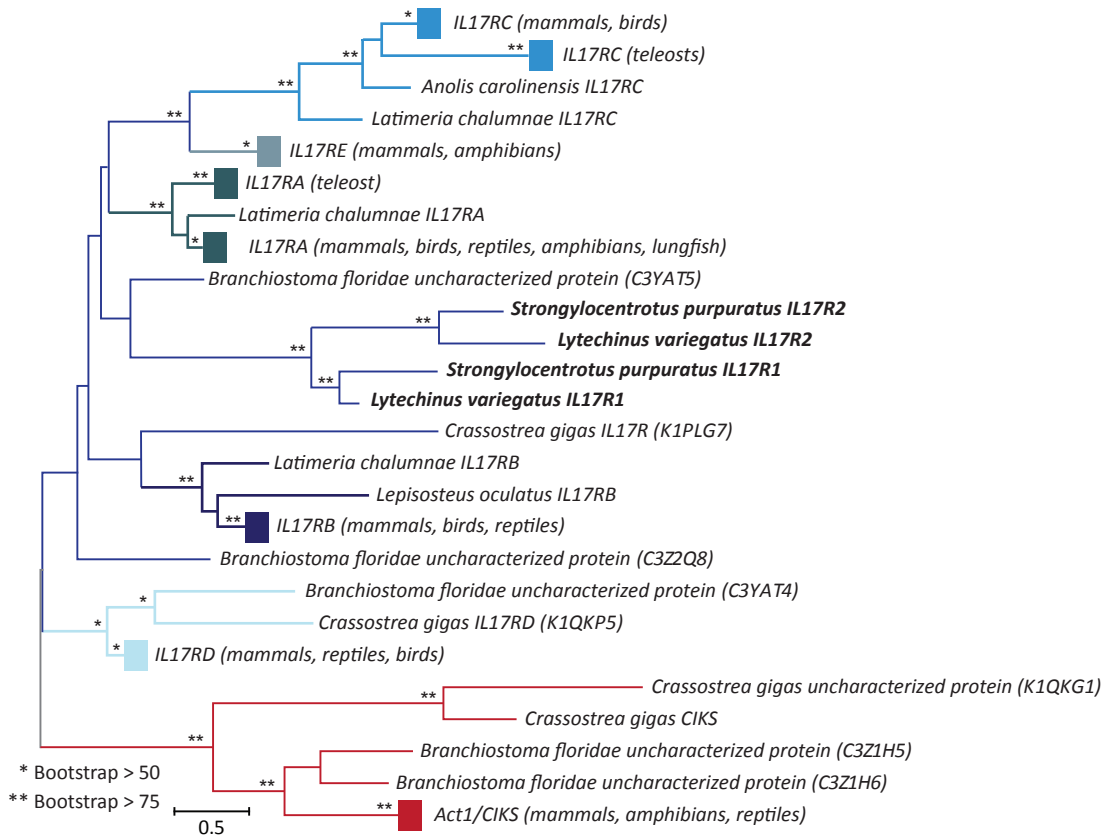

#### IL17RA

*Homo sapiens* (Human)  
*Pan troglodytes* (Chimpanzee)  
*Nomascus leucogenys* (Northern white-cheeked gibbon)  
*Macaca mulatta* (Rhesus macaque)  
*Papio anubis* (Olive baboon)  
*Chlorocebus sabaeus* (Green monkey)  
*Callithrix jacchus* (White-tufted-ear marmoset)  
*Otolemur garnettii* (Small-eared galago)  
*Mus musculus* (Mouse)  
*Rattus norvegicus* (Rat)  
*Mustela putorius furo* (European domestic ferret)  
*Cavia porcellus* (Guinea pig)  
*Felis catus* (Cat) (*Felis silvestris catus*)  
*Canis lupus familiaris* (Dog)  
*Bos taurus* (Bovine)  
*Equus caballus* (Horse)  
*Oryctolagus cuniculus* (Rabbit)  
*Ailuropoda melanoleuca* (Giant panda)  
*Myotis lucifugus* (Little brown bat)  
*Loxodonta africana* (African elephant)  
*Monodelphis domestica* (Gray short-tailed opossum)  
*Ornithorhynchus anatinus* (Duckbill platypus)  
*Sarcophilus harrisii* (Tasmanian devil)  
*Anas platyrhynchos* (Mallard)  
*Ficedula albicollis* (Collared flycatcher)  
*Meleagris gallopavo* (Common turkey)  
*Taeniopygia guttata* (Zebra finch)  
*Anolis carolinensis* (Green anole)  
*Ophiophagus hannah* (King cobra)  
*Latimeria chalumnae* (West Indian ocean coelacanth)

*Astyanax mexicanus* (Blind cave fish)  
*Danio rerio* (Zebrafish)  
*Lepisosteus oculatus* (Spotted gar)  
*Poecilia formosa* (Amazon molly)

#### IL17RB

*Homo sapiens* (Human)  
*Gorilla gorilla gorilla* (Western lowland gorilla)  
*Nomascus leucogenys* (Northern white-cheeked gibbon)  
*Macaca mulatta* (Rhesus macaque)  
*Papio anubis* (Olive baboon)  
*Chlorocebus sabaeus* (Green monkey)  
*Callithrix jacchus* (White-tufted-ear marmoset)  
*Otolemur garnettii* (Small-eared galago)  
*Mus musculus* (Mouse)  
*Rattus norvegicus* (Rat)  
*Ictidomys tridecemlineatus* (Thirteen-lined ground squirrel)  
*Mustela putorius furo* (European domestic ferret)  
*Cavia porcellus* (Guinea pig)  
*Felis catus* (Cat)  
*Canis lupus familiaris* (Dog)  
*Bos taurus* (Bovine)  
*Equus caballus* (Horse)  
*Oryctolagus cuniculus* (Rabbit)  
*Ovis aries* (Sheep)  
*Sus scrofa* (Pig)  
*Ailuropoda melanoleuca* (Giant panda)  
*Loxodonta africana* (African elephant)  
*Monodelphis domestica* (Gray short-tailed opossum)  
*Anas platyrhynchos* (Mallard)  
*Anolis carolinensis* (Green anole)  
*Ophiophagus hannah* (King cobra)  
*Latimeria chalumnae* (West Indian ocean coelacanth)  
*Lepisosteus oculatus* (Spotted gar)

#### IL17RC

*Pan troglodytes* (Chimpanzee)  
*Gorilla gorilla gorilla* (Western lowland gorilla)  
*Pongo abelii* (Sumatran orangutan)  
*Papio anubis* (Olive baboon)  
*Callithrix jacchus* (White-tufted-ear marmoset)  
*Otolemur garnettii* (Small-eared galago)  
*Mus musculus* (Mouse)  
*Rattus norvegicus* (Rat)  
*Ictidomys tridecemlineatus* (Thirteen-lined ground squirrel)  
*Cavia porcellus* (Guinea pig)  
*Felis catus* (Cat) (*Felis silvestris catus*)  
*Canis lupus familiaris* (Dog) (*Canis familiaris*)  
*Bos taurus* (Bovine)  
*Oryctolagus cuniculus* (Rabbit)  
*Ovis aries* (Sheep)  
*Sus scrofa* (Pig)  
*Ailuropoda melanoleuca* (Giant panda)  
*Myotis lucifugus* (Little brown bat)  
*Loxodonta africana* (African elephant)  
*Monodelphis domestica* (Gray short-tailed opossum)  
*Ornithorhynchus anatinus* (Duckbill platypus)  
*Ficedula albicollis* (Collared flycatcher)  
*Anolis carolinensis* (Green anole)  
*Xiphophorus maculatus* (Southern platyfish)  
*Latimeria chalumnae* (West Indian ocean coelacanth)

*Poecilia formosa* (Amazon molly) (*Limia formosa*)  
*Takifugu rubripes* (Japanese pufferfish)  
*Tetraodon nigroviridis* (Spotted green pufferfish)

#### IL17RD

*Homo sapiens* (Human)  
*Pan troglodytes* (Chimpanzee)  
*Gorilla gorilla gorilla* (Western lowland gorilla)  
*Pongo abelii* (Sumatran orangutan)  
*Nomascus leucogenys* (Northern white-cheeked gibbon)  
*Macaca mulatta* (Rhesus macaque)  
*Chlorocebus sabaeus* (Green monkey)  
*Callithrix jacchus* (White-tufted-ear marmoset)  
*Otolemur garnettii* (Small-eared galago)  
*Mus musculus* (Mouse)  
*Rattus norvegicus* (Rat)  
*Ictidomys tridecemlineatus* (Thirteen-lined ground squirrel)  
*Mustela putorius furo* (European domestic ferret)  
*Cavia porcellus* (Guinea pig)  
*Felis catus* (Cat)  
*Canis lupus familiaris* (Dog)  
*Bos taurus* (Bovine)  
*Equus caballus* (Horse)  
*Oryctolagus cuniculus* (Rabbit)  
*Ovis aries* (Sheep)  
*Sus scrofa* (Pig)  
*Ailuropoda melanoleuca* (Giant panda)  
*Myotis lucifugus* (Little brown bat)  
*Loxodonta africana* (African elephant)  
*Ornithorhynchus anatinus* (Duckbill platypus)  
*Anas platyrhynchos* (Mallard)  
*Ficedula albicollis* (Collared flycatcher)  
*Gallus gallus* (Chicken)  
*Meleagris gallopavo* (Common turkey)  
*Taeniopygia guttata* (Zebra finch)  
*Anolis carolinensis* (Green anole)  
*Ophiophagus hannah* (King cobra)  
*Xenopus tropicalis* (Western clawed frog)  
*Latimeria chalumnae* (West Indian ocean coelacanth)  
*Danio rerio* (Zebrafish)  
*Branchiostoma floridae* (Florida lancelet)  
*Crassostrea gigas* (Pacific oyster)

#### IL17RE

*Macaca mulatta* (Rhesus macaque)  
*Callithrix jacchus* (White-tufted-ear marmoset)  
*Mus musculus* (Mouse)  
*Rattus norvegicus* (Rat)  
*Mustela putorius furo* (European domestic ferret)  
*Canis lupus familiaris* (Dog)  
*Sus scrofa* (Pig)  
*Myotis lucifugus* (Little brown bat)  
*Monodelphis domestica* (Gray short-tailed opossum)  
*Anolis carolinensis* (Green anole)  
*Xenopus tropicalis* (Western clawed frog)

#### Act1/CIKS

*Homo sapiens* (Human)  
*Mus musculus* (Mouse)  
*Cricetulus griseus* (Chinese hamster)  
*Fukomys damarensis* (Damaraland mole rat)  
*Pteropus alecto* (Black flying fox)  
*Oryctolagus cuniculus* (Rabbit)  
*Myotis davidii* (David's myotis)  
*Ophiophagus hannah* (King cobra)  
*Xenopus tropicalis* (Western clawed frog)  
*Branchiostoma floridae* (Florida lancelet)  
*Crassostrea gigas* (Pacific oyster)
