# Supplementary material for: IL17 factors are early regulators in the gut epithelium during inflammatory response to Vibrio in the sea urchin larva
Source: eLife journal article supplement (doi:10.7554/elife.23481), 2017-04-27
Supplement: supp [file elife-23481-supp-v1.zip]

|                  |    | SplL17 subfamily  |           |           |           |                   |                   |           |           |                   |                   | Human             |
|------------------|----|-------------------|-----------|-----------|-----------|-------------------|-------------------|-----------|-----------|-------------------|-------------------|-------------------|
|                  |    | 1                 | 2         | 3         | 4         | 5                 | 6                 | 7         | 8         | 9                 | 10                |                   |
| SplL17 subfamily | 1  | 94.9<br>84.7-99.5 | 29.2      | 42.4      | 30.7      | 40.9              | 33.7              | 36.7      | 31.2      | 32.4              | 57.2              | 30.1              |
|                  | 2  | 38.9-40.9         |           | 36.7      | 27.0      | 33.3              | 30.9              | 37.8      | 26.4      | 30.5              | 47.6              | 31.4              |
|                  | 3  | 33.5-35.6         |           |           | 24.5      | 32.1              | 29.8              | 31.0      | 31.8      | 25.5              | 40.7              | 29.2              |
|                  | 4  | 22.2-24.4         |           |           |           | 29.7              | 29.4              | 29.3      | 26.1      | 29.6              | 30.3              | 29.2              |
|                  | 5  | 29.3-32.5         | 24.8-25.8 | 23.0-23.7 | 20.0-21.9 | 88.1<br>85.6-85.6 | 34.7              | 35.6      | 30.1      | 31.1              | 38.3              | 31.8              |
|                  | 6  | 22.0-27.8         | 22.2-22.9 | 23.6-24.8 | 20.9-23.6 | 25.9-28.5         | 93.8<br>91.6-94.2 | 32.5      | 30.4      | 27.2              | 32.2              | 29.9              |
|                  | 7  | 27.1-29.6         |           |           |           | 25.1-27.4         | 24.1-24.5         |           | 35.6      | 33.0              | 33.8              | 30.9              |
|                  | 8  | 22.4-24.6         |           |           |           | 20.1-21.8         | 21.4-22.6         |           |           | 28.1              | 31.4              | 26.7              |
|                  | 9  | 16.2-27.9         | 18.9-23.7 | 15.5-20.8 | 17.3-23.4 | 18.6-27.4         | 17.4-23.7         | 20.1-28.9 | 18.0-23.1 | 71.9<br>47.7-98.7 | 30.9              | 26.1              |
|                  | 10 | 44.8-51.9         | 40.4-41.2 | 32.6-33.3 | 22.3-25.2 | 28.2-29.5         | 22.6-25.1         | 26.3-27.7 | 22.5-24.3 | 19.3-25.6         | 89.8<br>87.3-87.3 | 29.2              |
| Human            |    | 18.1-25.9         | 20.1-26.1 | 20.0-24.2 | 18.8-24.9 | 15.8-31.5         | 20.8-25.6         | 21.1-26.2 | 17.9-21.9 | 14.7-25.4         | 17.4-25.1         | 35.0<br>20.9-86.7 |

| % Amino acid identity |         |      |
|-----------------------|---------|------|
| < 30                  | 30 - 65 | > 65 |
| < 30                  | 30 - 65 | > 65 |
