# Supplementary figures and images for: IL17 factors are early regulators in the gut epithelium during inflammatory response to Vibrio in the sea urchin larva
Source: eLife journal article supplement (doi:10.7554/elife.23481), 2017-04-27

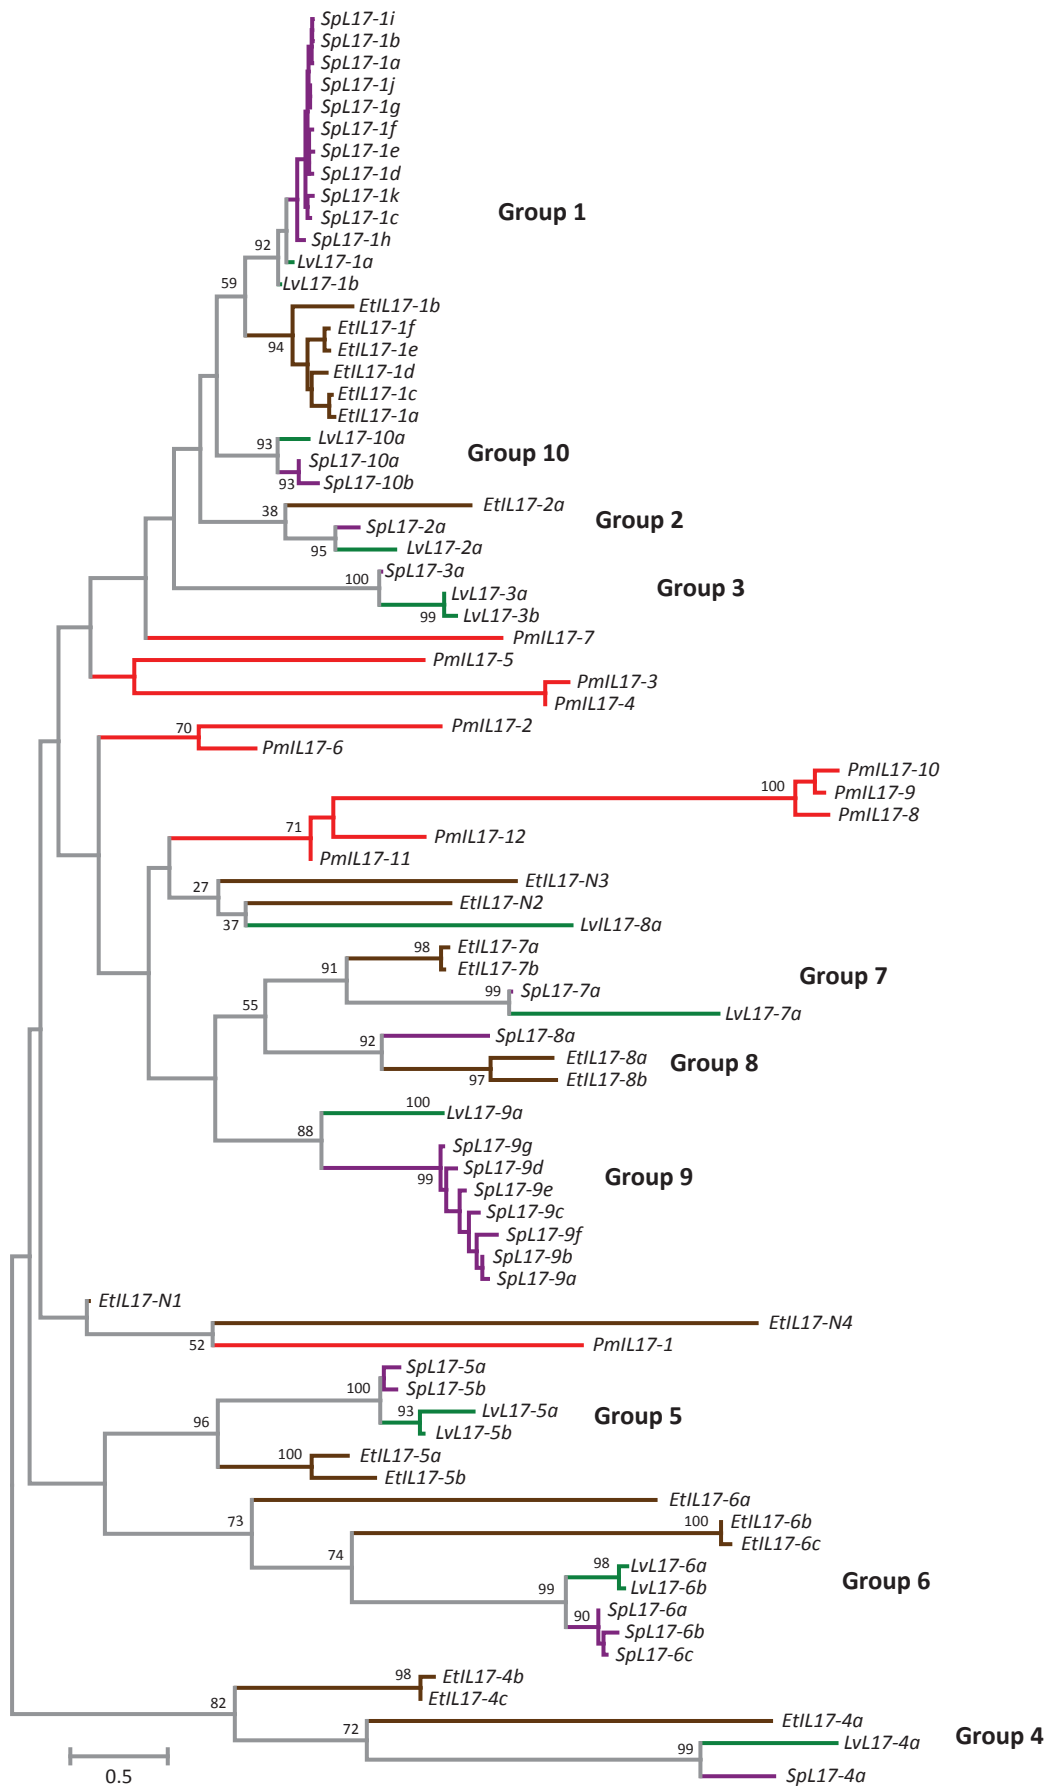

Supplement: supp [file elife-23481-supp-v1.zip]

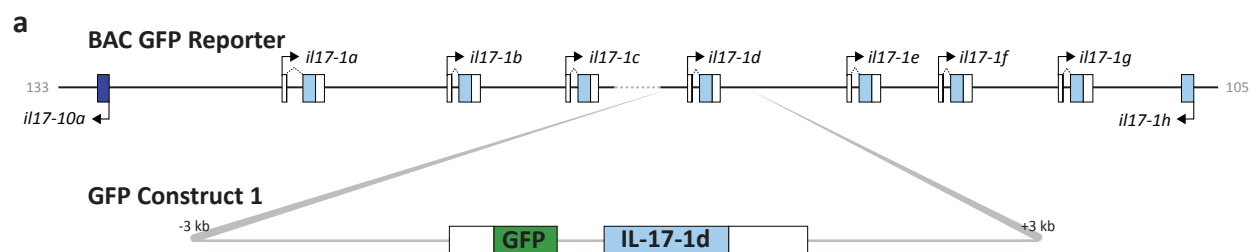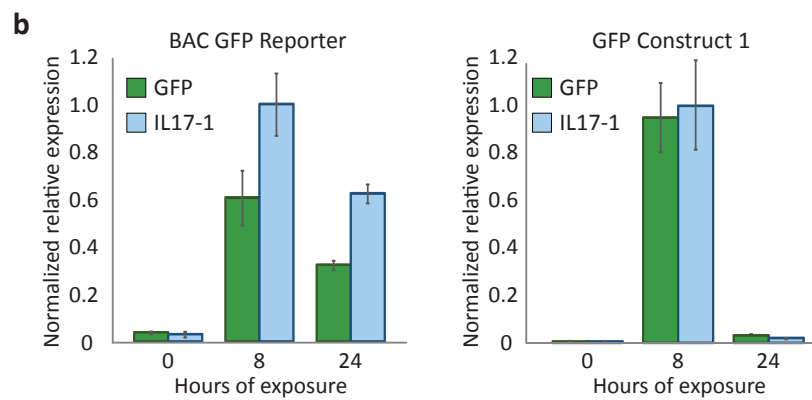

Supplement: supp [file elife-23481-supp-v1.zip]

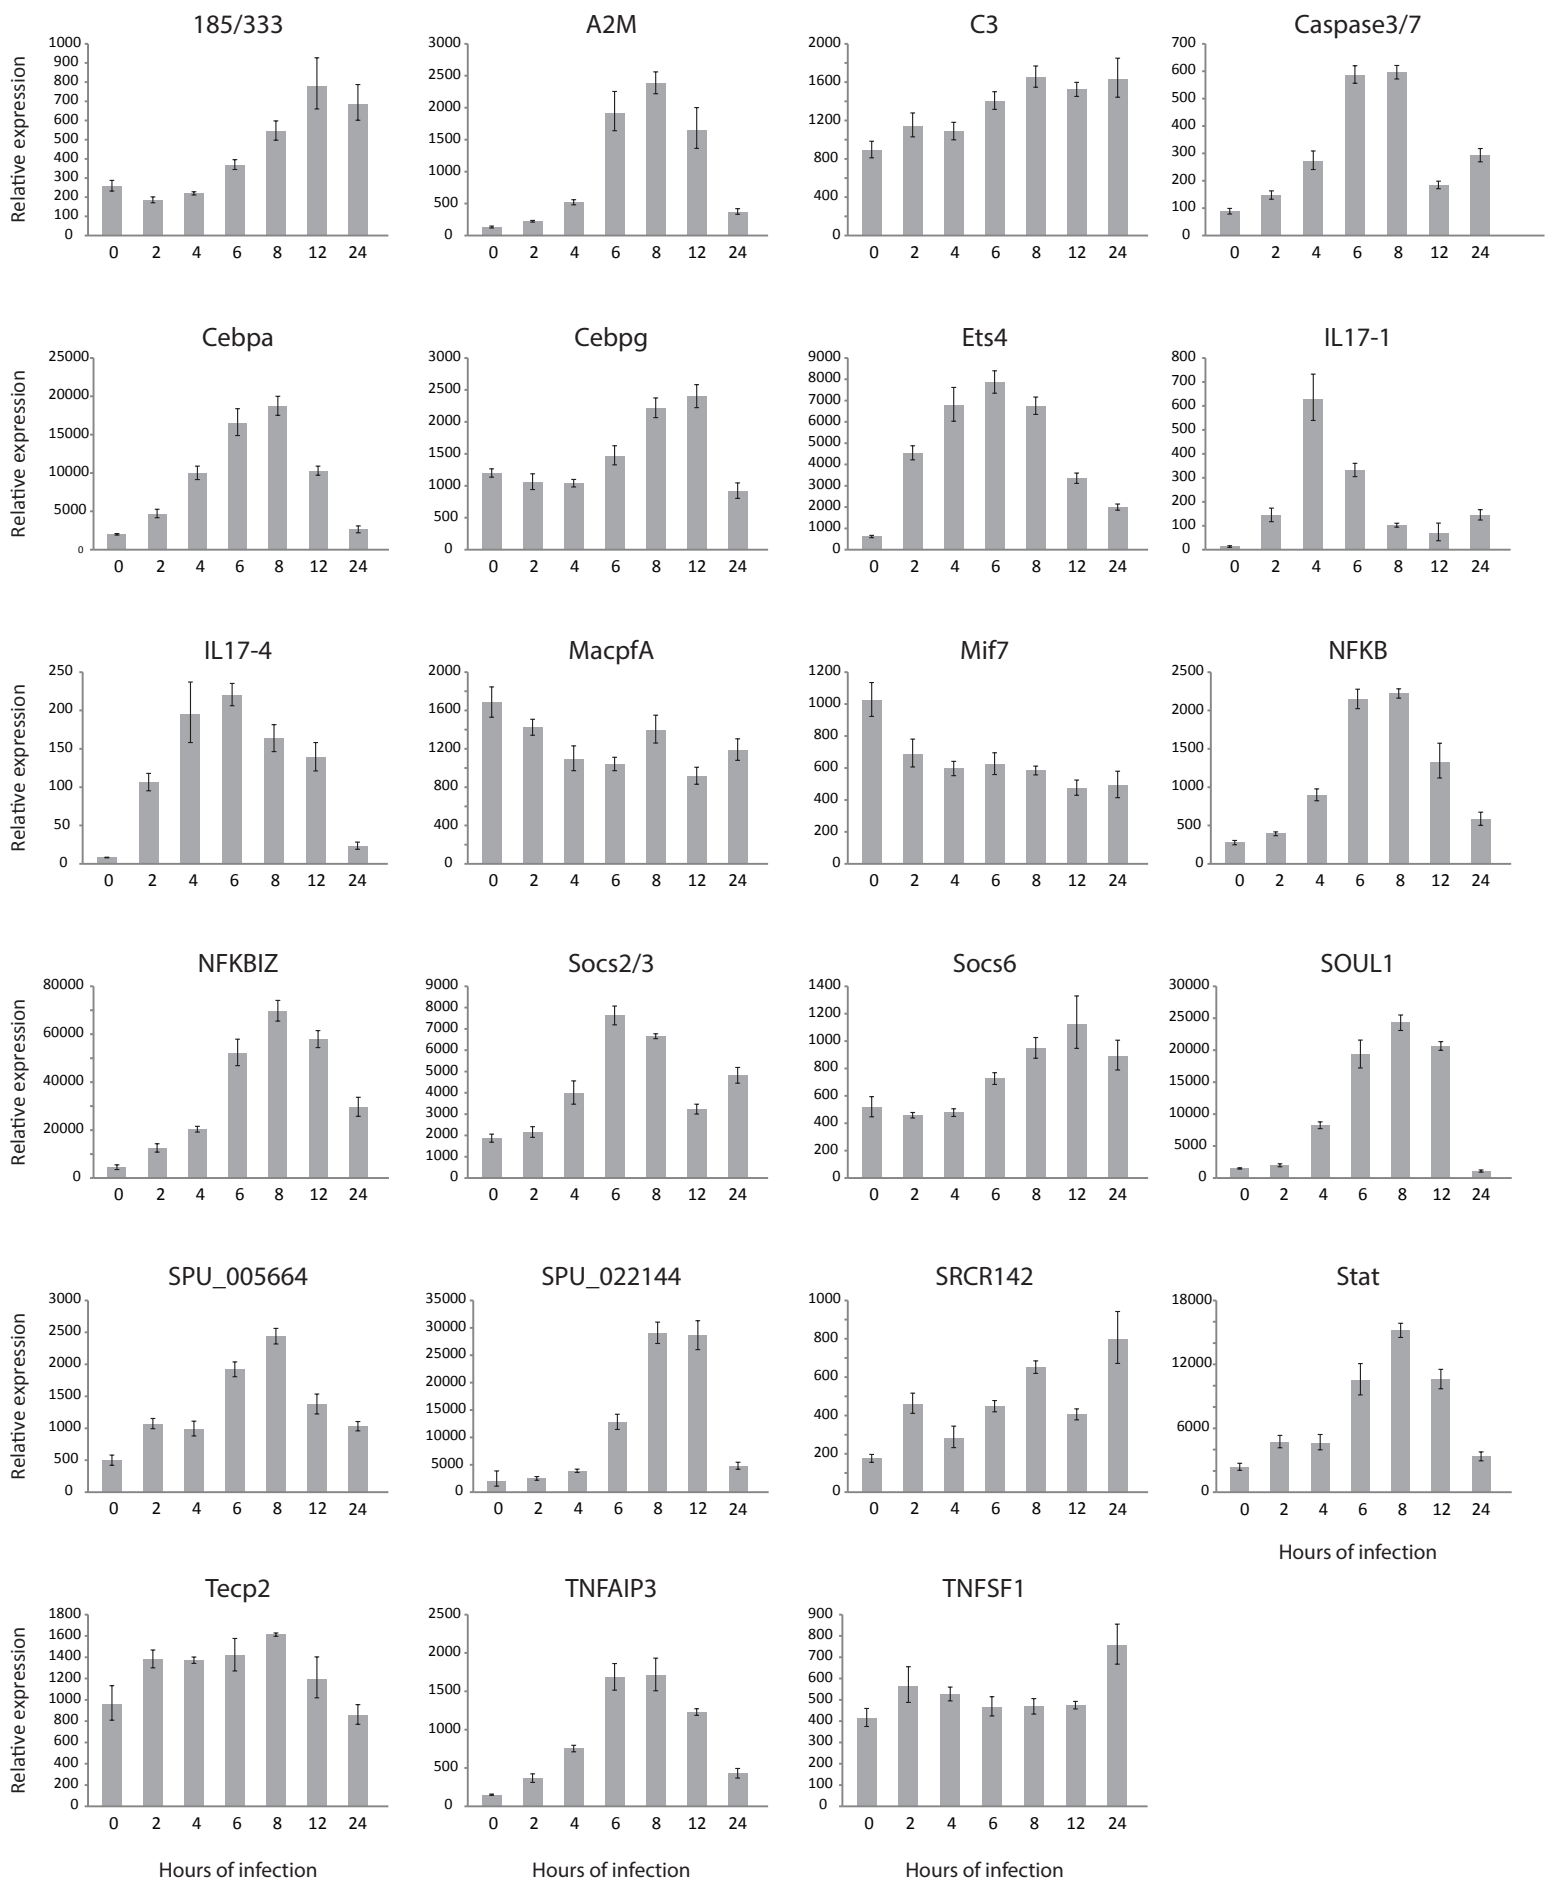

Supplement: supp [file elife-23481-supp-v1.zip]

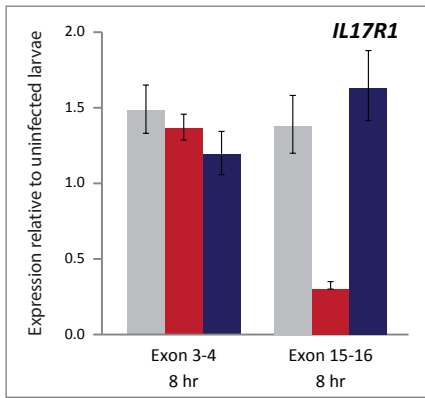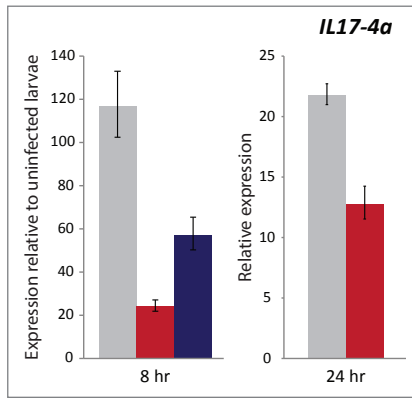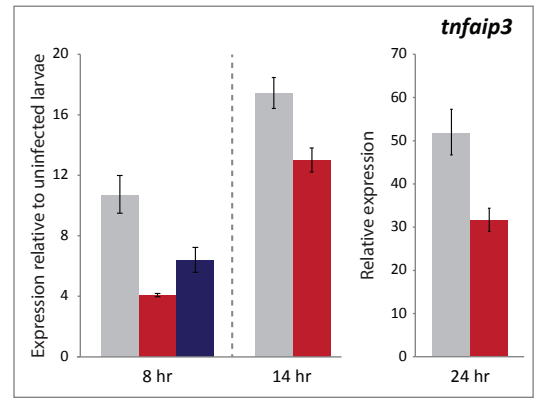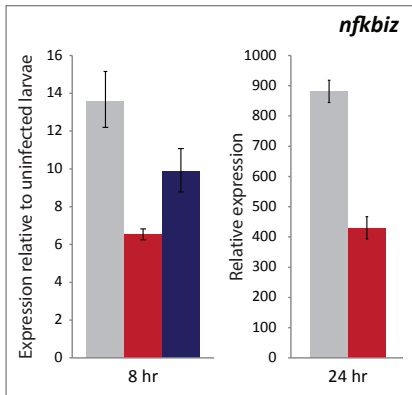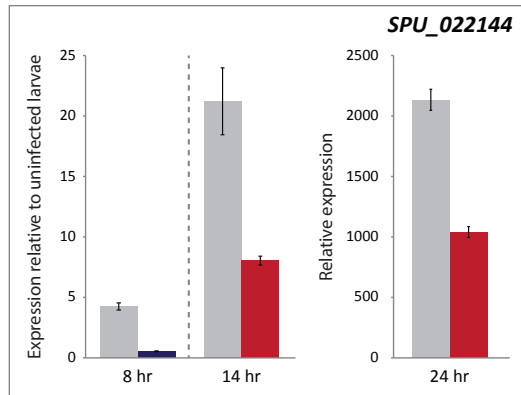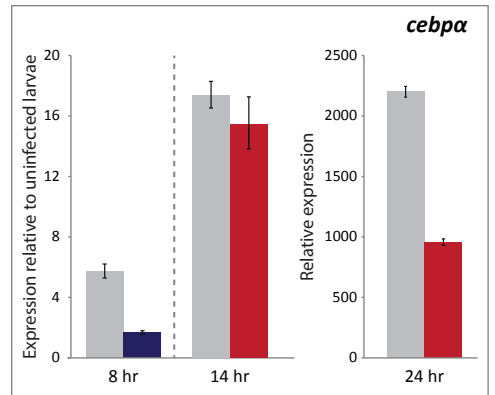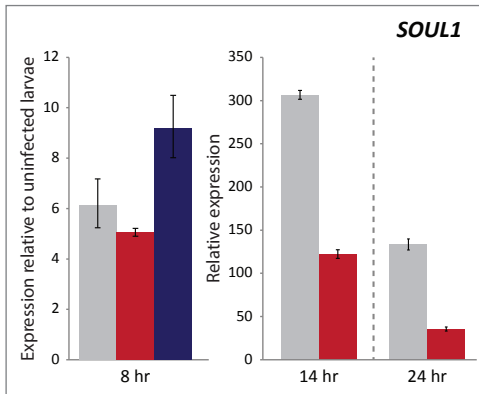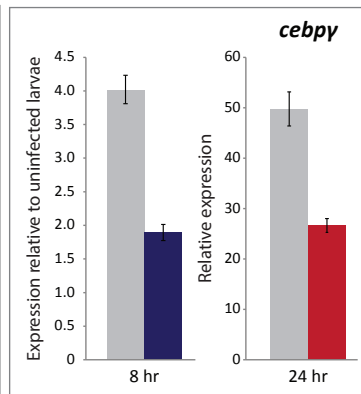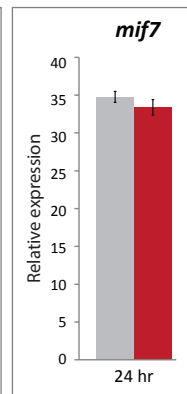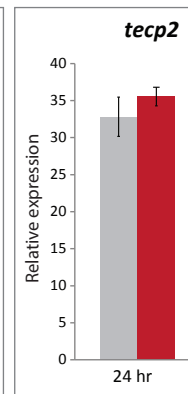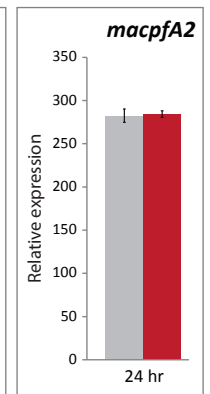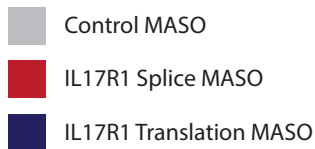

Supplement: supp [file elife-23481-supp-v1.zip]

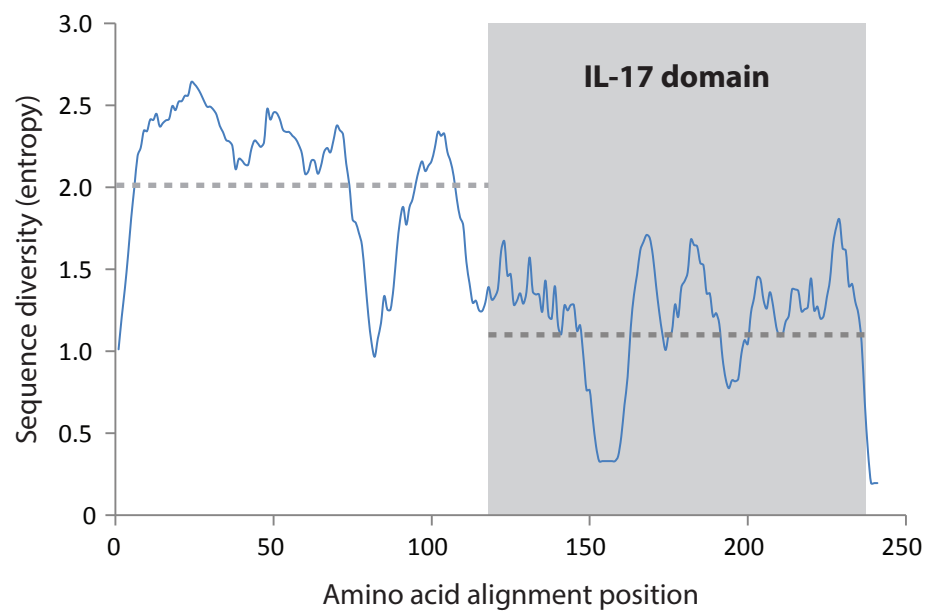

Supplement: supp [file elife-23481-supp-v1.zip]

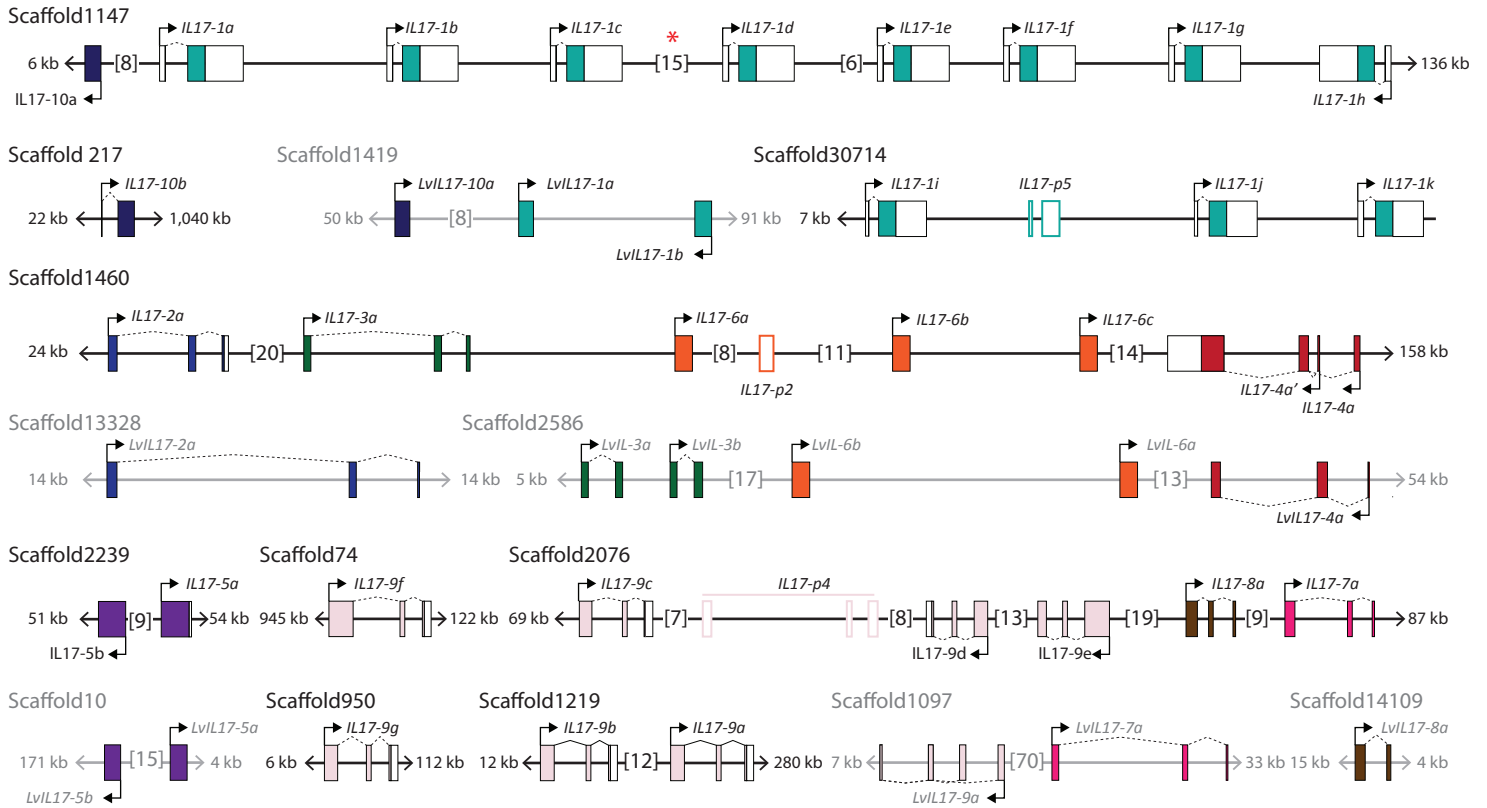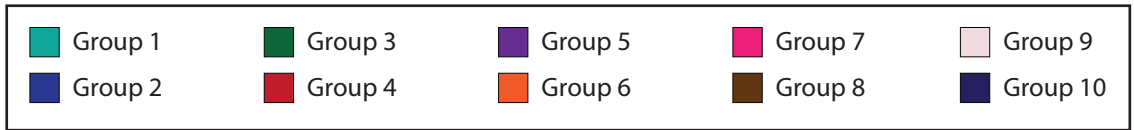

2 kb

Supplement: supp [file elife-23481-supp-v1.zip]

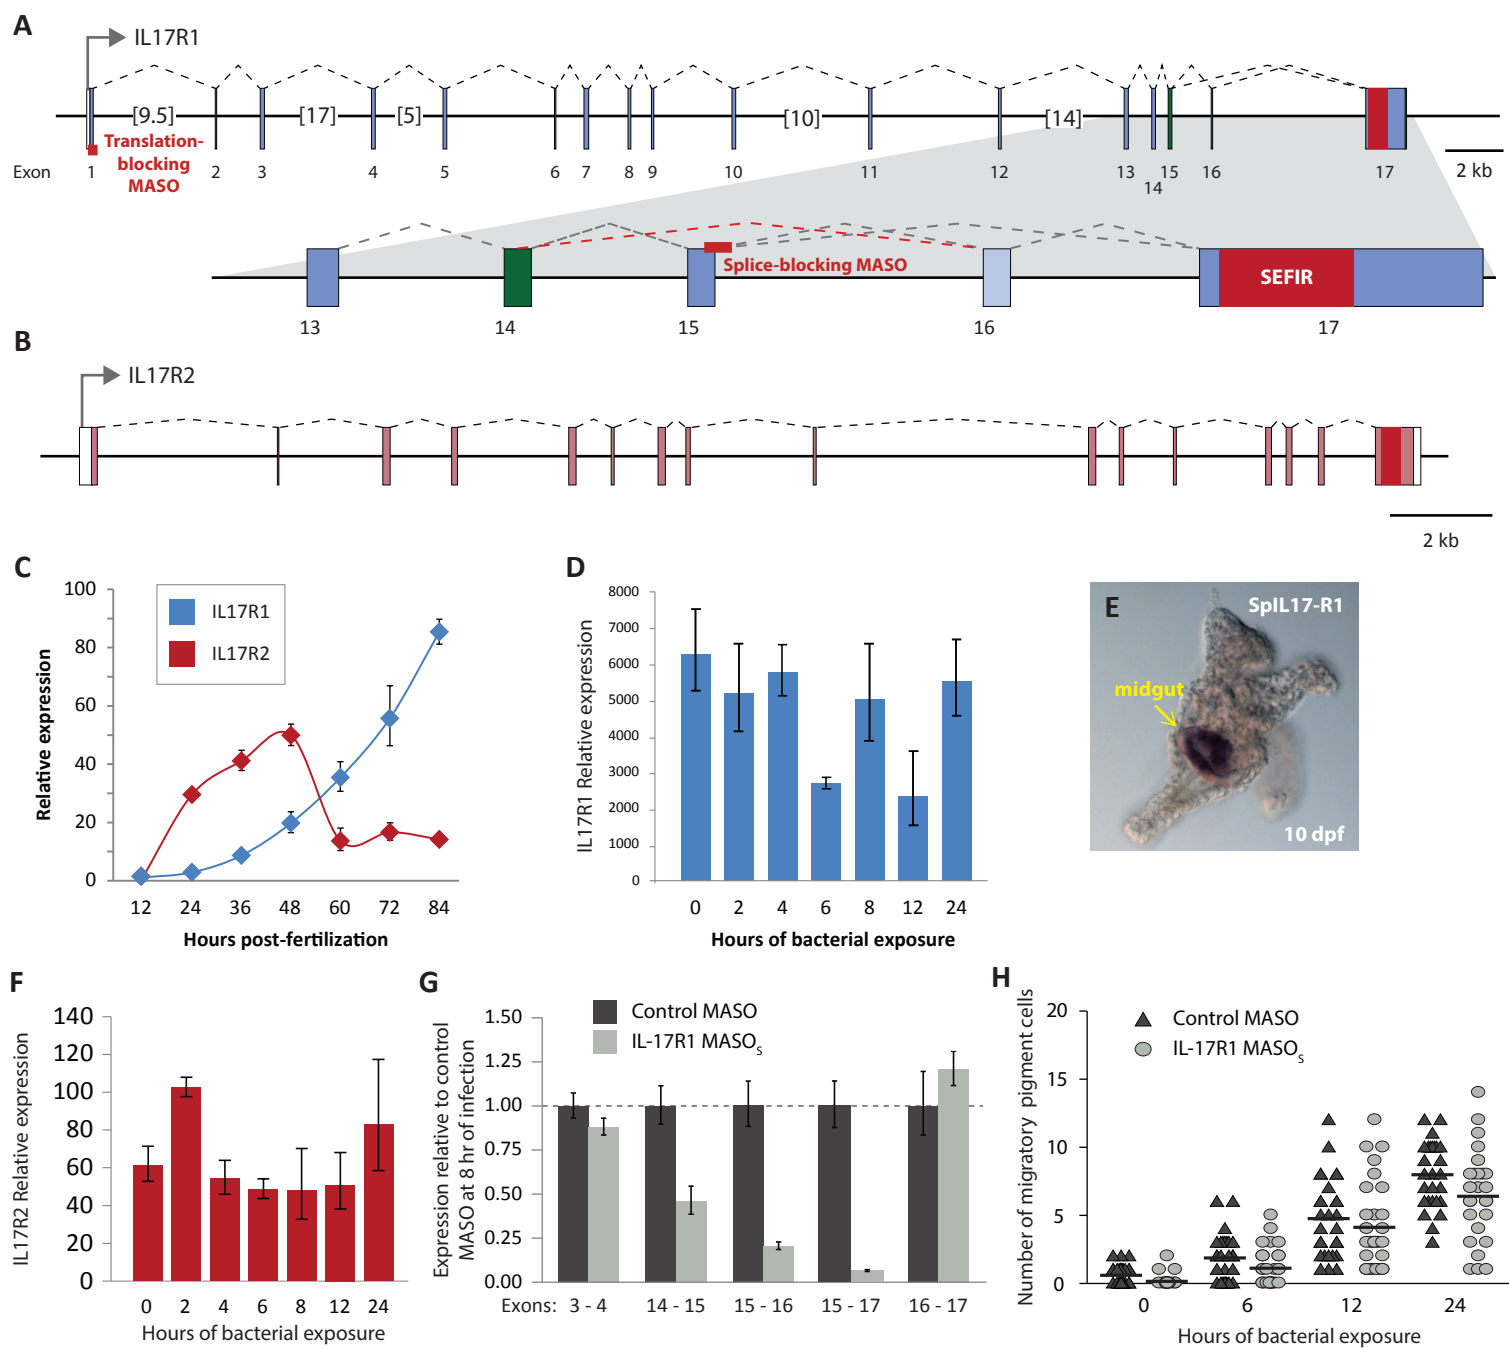

Supplement: supp [file elife-23481-supp-v1.zip]
